# Supplementary material for: Worldwide health effects of the Fukushima Daiichi nuclear accident
Source: Royal Society of Chemistry journal article supplement (doi:10.1039/c2ee22019a), 2012-01-01
Supplement: c2ee22019a.pdf [file c2ee22019a.pdf]

## Supplementary Information for the Manuscript “Worldwide Health Effects of the Fukushima Daiichi Nuclear Accident”

John E. Ten Hoeve<sup>1</sup>, Mark Z. Jacobson<sup>2</sup>

{1} Department of Civil and Environmental Engineering, Stanford University, Yang and Yamazaki Environment and Energy Building, 473 Via Ortega, #390A Stanford, California 94305-4020, USA; Email: [tenhoeve@stanford.edu](mailto:tenhoeve@stanford.edu); Tel: (650) 721-2730.

{2} Department of Civil and Environmental Engineering, Stanford University, Yang and Yamazaki Environment and Energy Building, 473 Via Ortega, #397 Stanford, California 94305-4020, USA; Email: [jacobson@stanford.edu](mailto:jacobson@stanford.edu); Tel: (650) 723-6836.

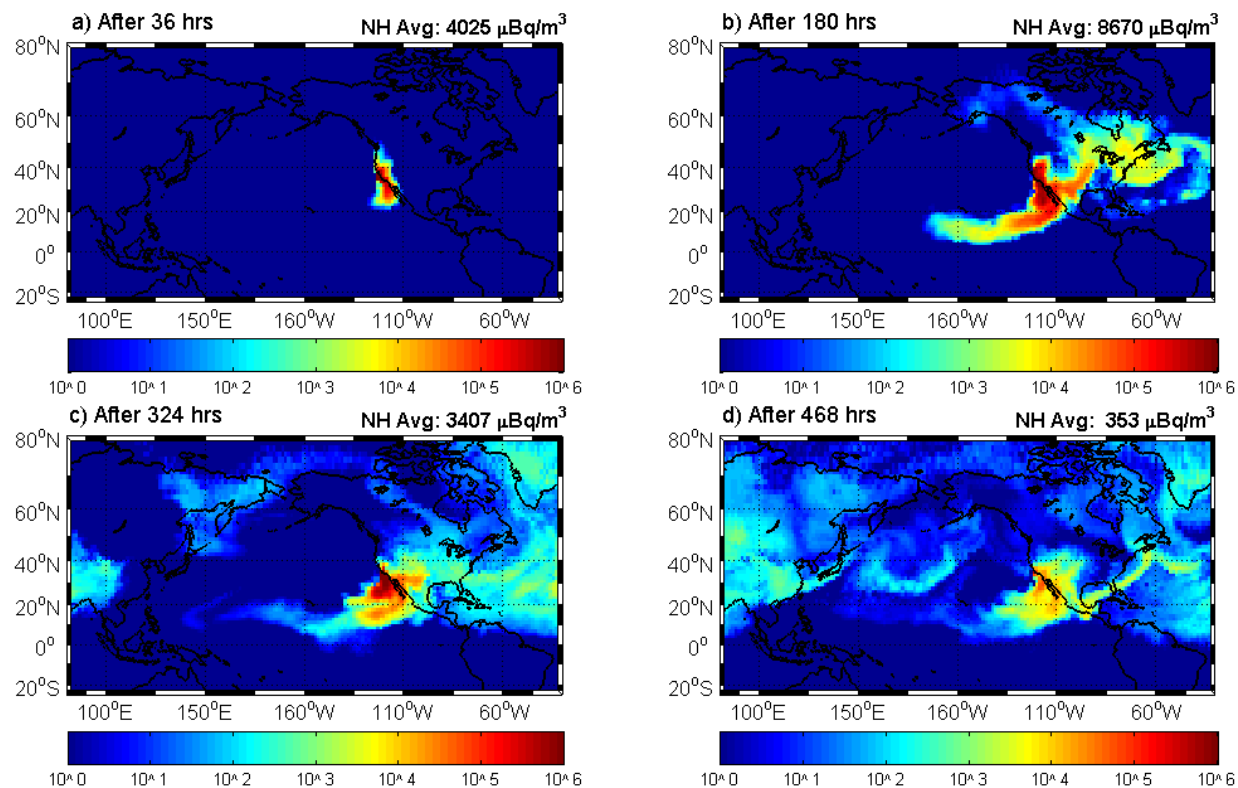

Figure S1: Modeled near-surface atmospheric worldwide activity concentrations ( $\mu\text{Bq}/\text{m}^3$ ) of Cs-137 (a) 36 hours (1.5 days), (b) 180 hours (7.5 days), (c) 324 hours (13.5 days), and (d) 468 hours (19.5 days) into the hypothetical Diablo Canyon simulation beginning on 12 March 2011. Northern Hemisphere (NH) averages noted above each panel are weighted by population.

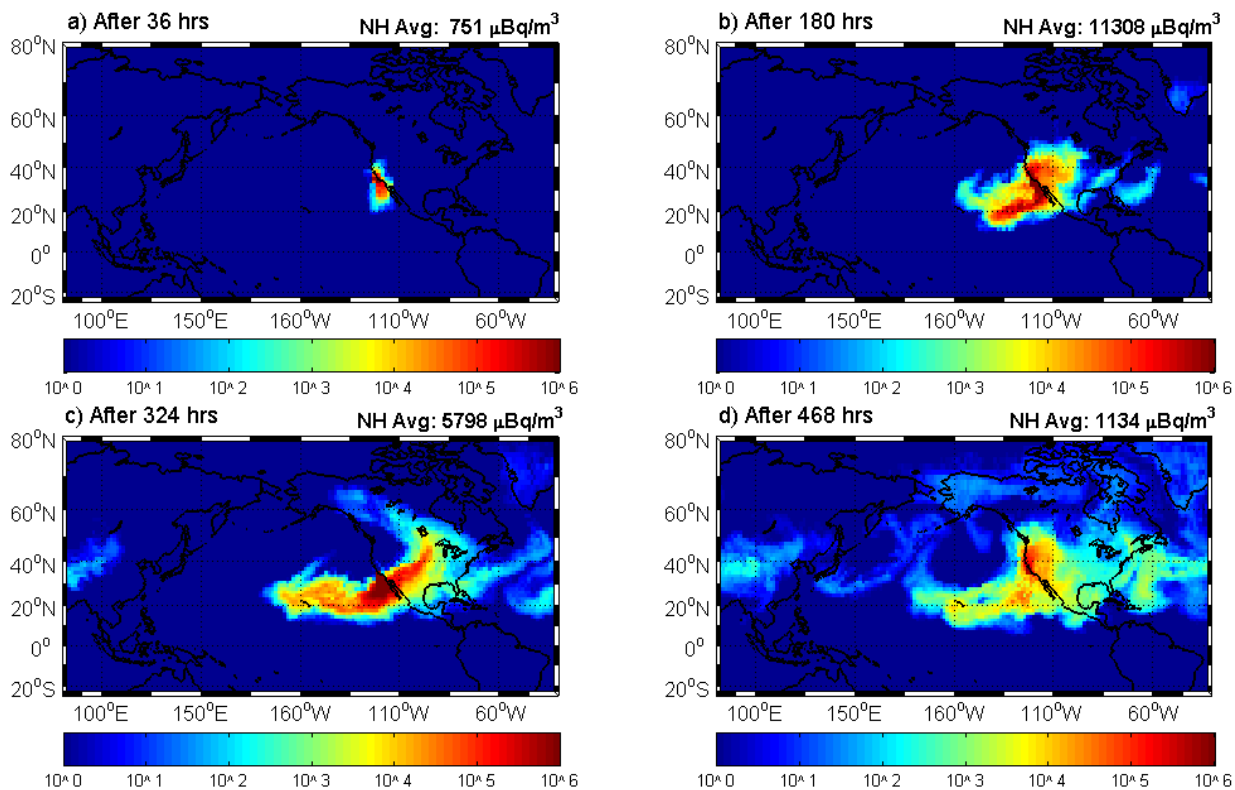

Figure S2: Modeled near-surface atmospheric worldwide activity concentrations ( $\mu\text{Bq}/\text{m}^3$ ) of Cs-137 (a) 36 hours (1.5 days), (b) 180 hours (7.5 days), (c) 324 hours (13.5 days), and (d) 468 hours (19.5 days) into the hypothetical Diablo Canyon simulation beginning on 12 September 2006. Northern Hemisphere (NH) averages noted above each panel are weighted by population.
